# Supplementary material
Source: bioRxiv or medRxiv preprint supplement (https://medrxiv.org/highwire/filestream/69591/field_highwire_adjunct_files/0/19009258-1.pdf)

## Supporting information

**S1 Fig.** Districts with unusual incidence patterns resulting in inflated dispersion estimates.

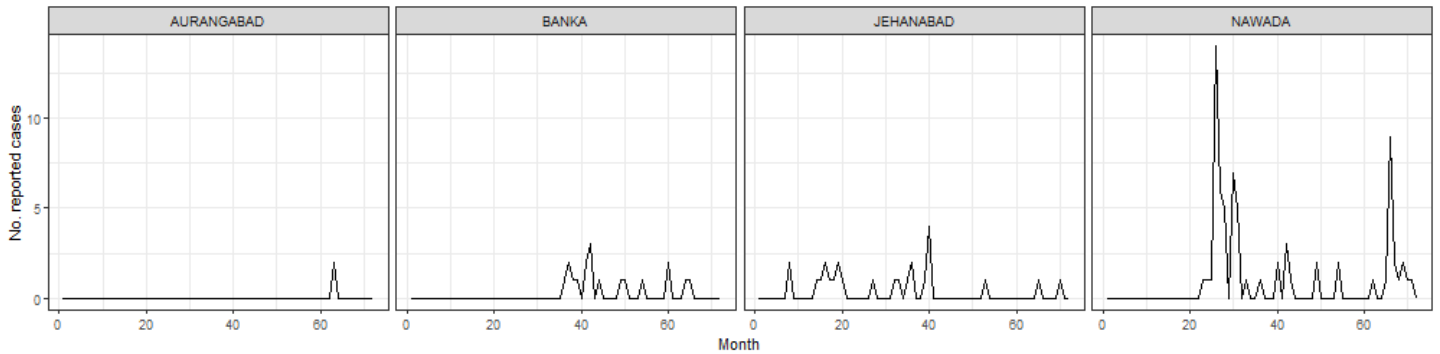

**S2 Fig.** Probability integral transform (PIT) histograms for models with increasing orders of geometric lags from 1 to 12 months (left to right, top to bottom) in the autoregressive component. The final model selection process considered up to four lags.



S1 Table. Fit and prediction metrics for selected model at each stage. The reported AIC is for the fit to training data only, and RPS is of predictions made without updating this fit (i.e. fixed instead of rolling). C2575 and C1090 refer to the coverage of 50% and 80% quantile intervals, respectively, alongside the average interval width in cases. Model no. 42 is the final model.

| Model No. | END               | AR                           | NE                      | No. parameters | AIC          | RPS          | Calibration (p-value) | C2575        | Avg. width   | C1090        | Avg. width   |
|-----------|-------------------|------------------------------|-------------------------|----------------|--------------|--------------|-----------------------|--------------|--------------|--------------|--------------|
| 1         | offset + 1 + t    |                              |                         | 3              | 65412        | 0.657        | <0.001                | 0.808        | 0.907        | 0.905        | 2.243        |
| 6         | offset + 1 + t    | AR(1) + seas(~1, S=1)        |                         | 6              | 57058        | 0.493        | 0.115                 | 0.842        | 1.124        | 0.942        | 2.388        |
| 23        | offset + 1 + t    | AR(2) + seas(~1, S=1)        |                         | 6              | 53833        | 0.455        | 0.189                 | 0.845        | 1.021        | 0.947        | 2.230        |
| 33        | offset + 1 + t    | AR(2) + seas(~1, S=1)        | NE(1) + seas(~1)        | 9              | 51675        | 0.437        | 0.122                 | 0.855        | 1.016        | 0.945        | 1.966        |
| <b>42</b> | <b>offset + 1</b> | <b>AR(4) + seas(~1, S=1)</b> | <b>NE(1) + seas(~1)</b> | <b>8</b>       | <b>50323</b> | <b>0.420</b> | <b>0.346</b>          | <b>0.857</b> | <b>0.982</b> | <b>0.946</b> | <b>1.872</b> |
| 52        | offset + t        | AR(4) + seas(~1, S=2)        | NE(1) + seas(~1)        | 10             | 50164        | 0.419        | 0.194                 | 0.856        | 0.981        | 0.945        | 1.868        |

S3 Fig. Blocks with average RPS greater than 2.5 over the test period (Jan 2017 - Dec 2018)

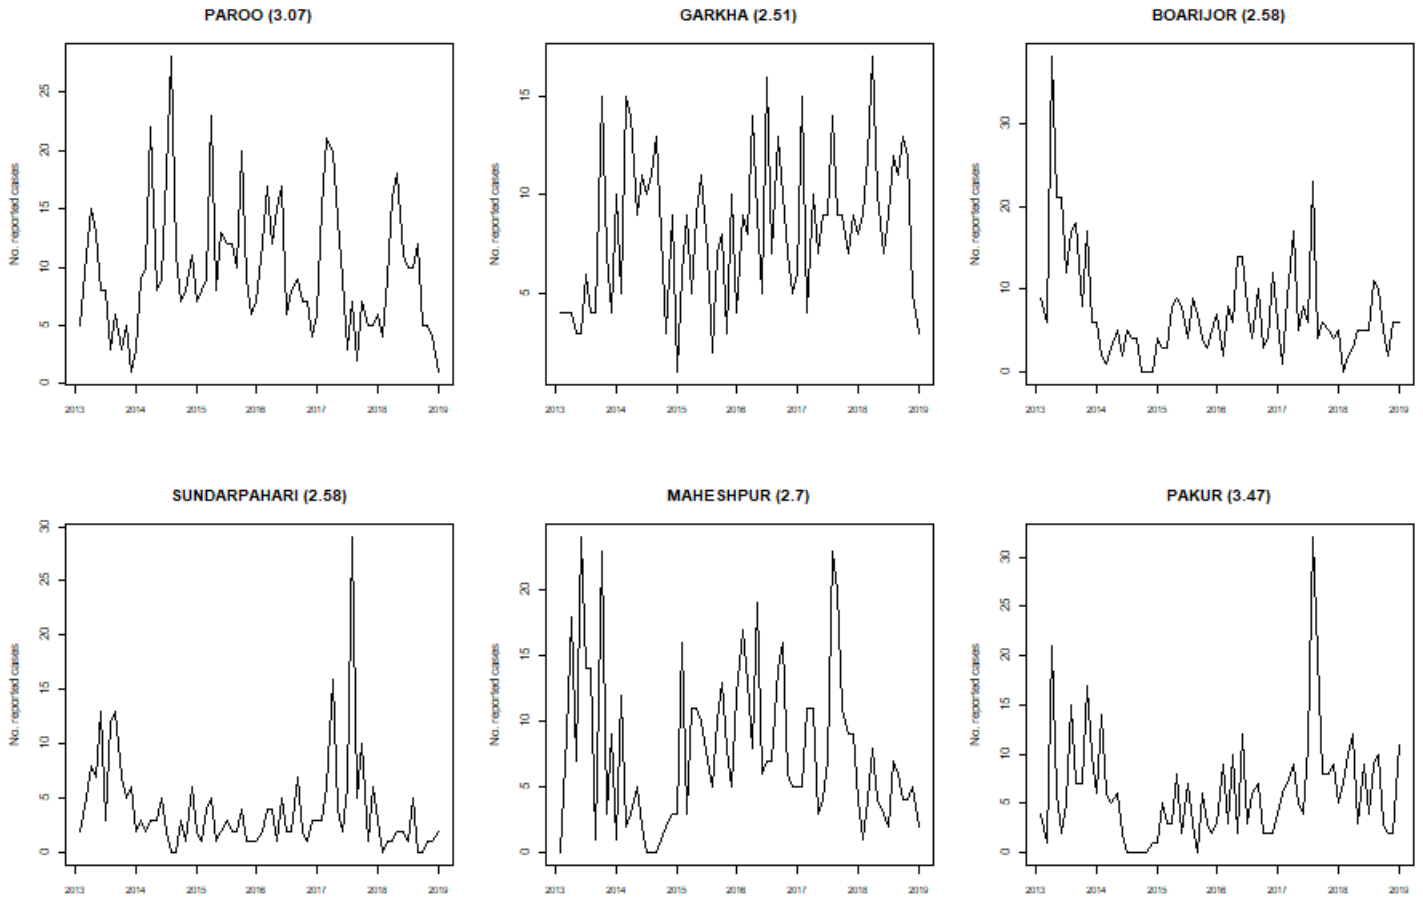

Supplement: Supplementary file [file 19009258-1.pdf]
